# Supplementary material for: Why solid oxide cells can be reversibly operated in solid oxide electrolysis cell and fuel cell modes?
Source: Royal Society of Chemistry journal article supplement (doi:10.1039/c5cp05065k), 2015-01-01
Supplement: c5cp05065k1.pdf [file c5cp05065k1.pdf]

## Supporting information

### Why the solid oxide cells can be reversibly operated under solid oxide electrolysis cell and fuel cell modes?

Kongfa Chen,<sup>a</sup> Shu-Sheng Liu,<sup>b,c</sup> Na Ai,<sup>a</sup> Michihisa Koyama,<sup>b, c, d</sup> San Ping Jiang<sup>a,\*</sup>

<sup>a</sup> Fuels and Energy Technology Institute & Department of Chemical Engineering, Curtin University, Perth, WA 6102, Australia

<sup>b</sup> INAMORI Frontier Research Center, Kyushu University, Fukuoka 819-0395, Japan

<sup>c</sup> CREST, Japan Science and Technology Agency, Tokyo 102-0076, Japan

<sup>d</sup> International Institute for Carbon-Neutral Energy Research, Kyushu University, Fukuoka 819-0395, Japan

---

\* Corresponding author. Tel.: +61 8 9266 9804; fax: +61 8 9266 1138.  
Email address: s.jiang@curtin.edu.au (S.P. Jiang).

## Results

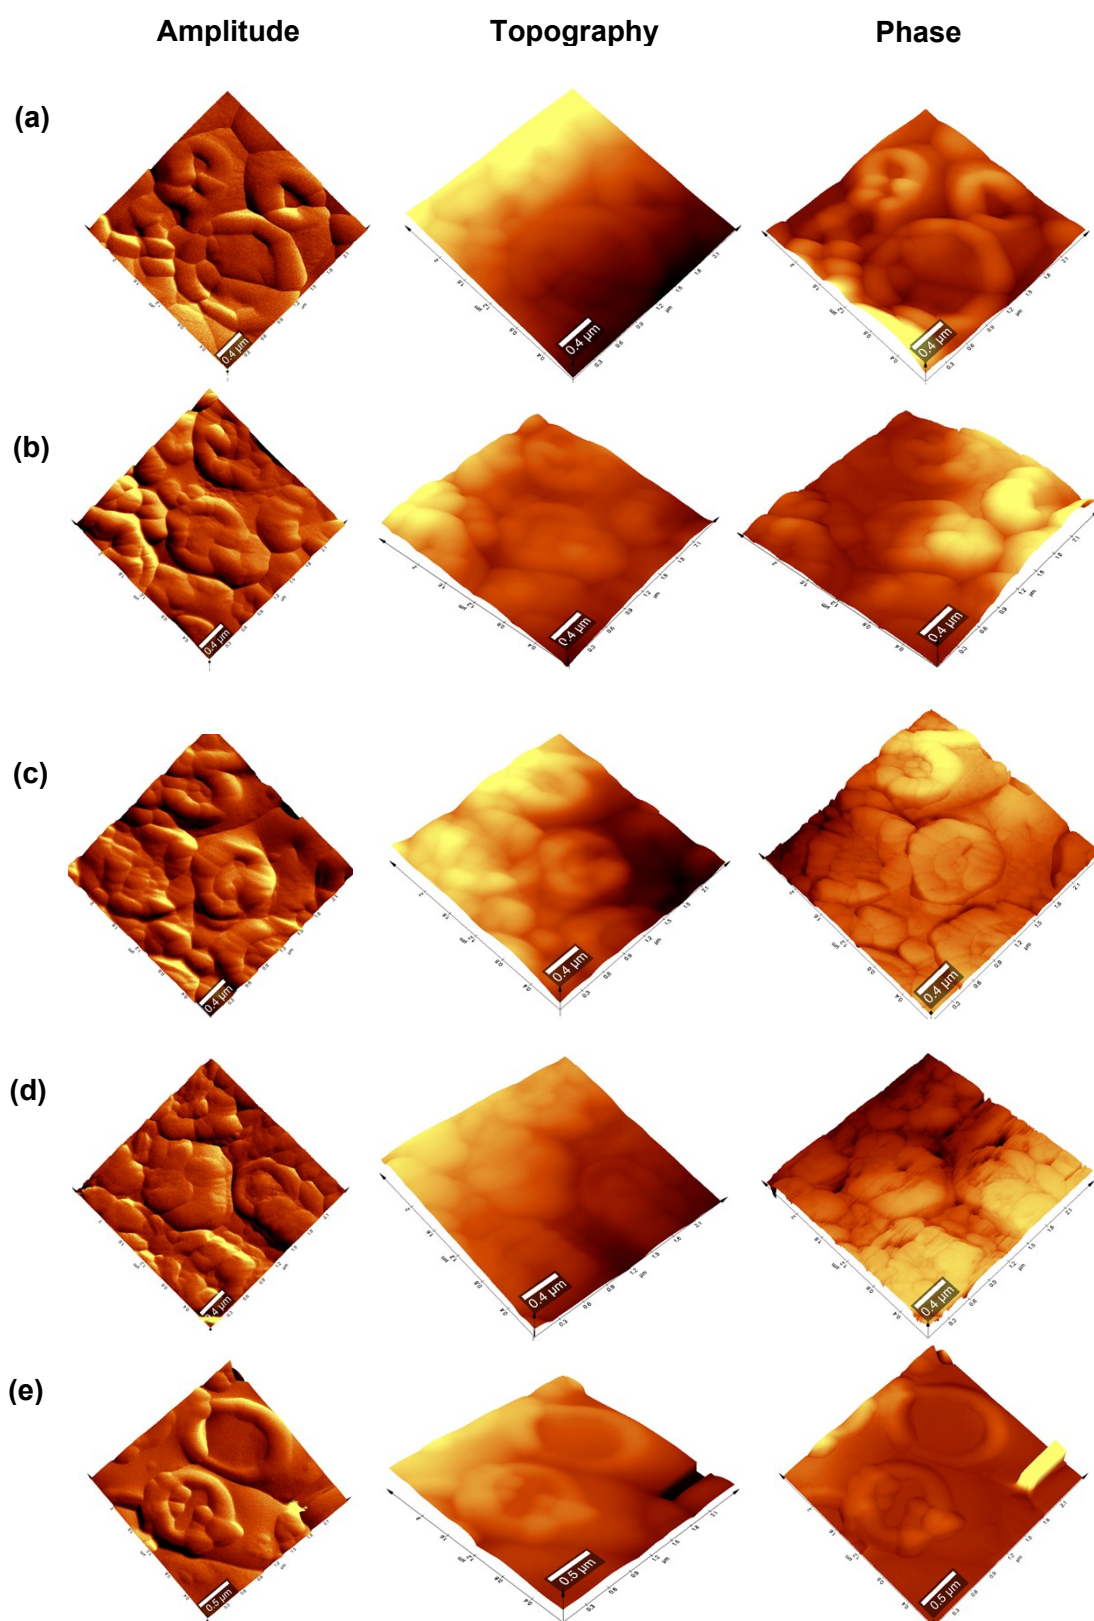

**Figure S1** AFM amplitudes, topographies and phases of electrolyte surface in contact with pre-sintered LSM electrodes after the polarization at  $500 \text{ mA cm}^{-2}$  and  $800 \text{ }^\circ\text{C}$ : continuous anodic polarization for 36 h (a) and 100 h (b), after 1 cycle (c) and 4 cycles (d) of 36 h-anodic/12 h-cathodic polarizations. The electrolyte surface in contact with as-prepared electrode is shown in (e).

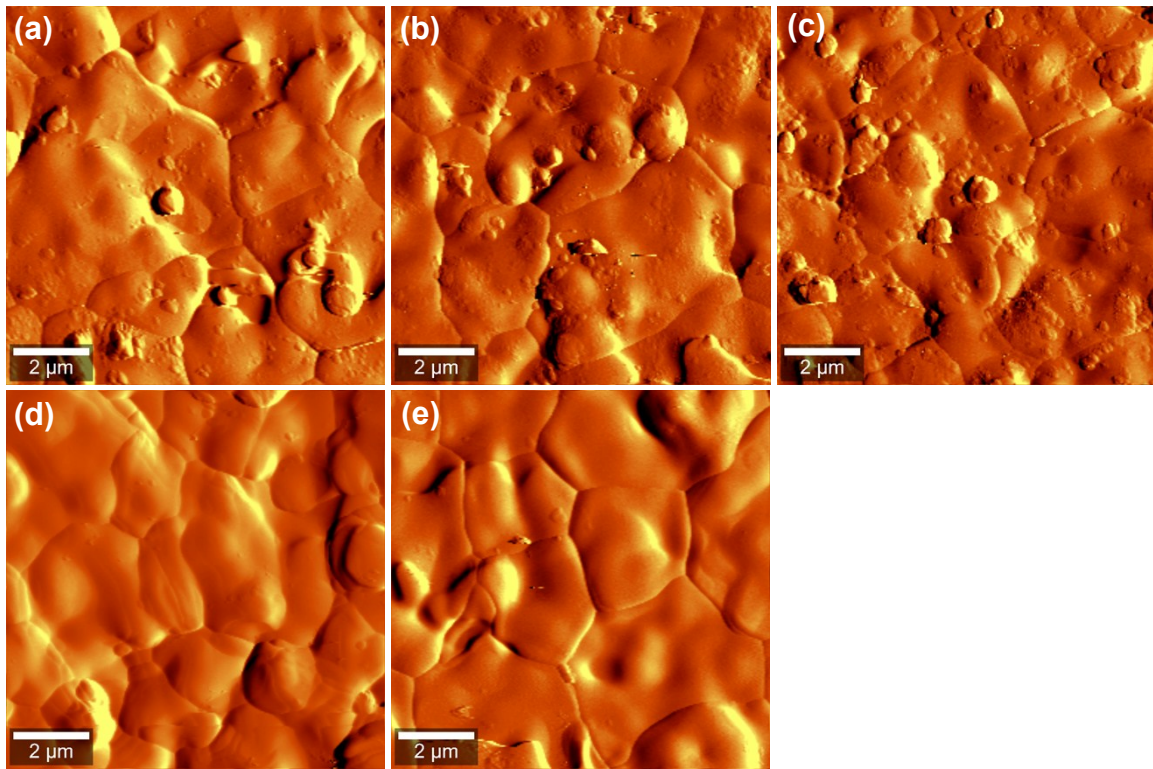

**Figure S2** AFM amplitudes of electrolyte surface in contact with the *in situ* assembled LSM electrodes after the cathodic polarization at 800°C: (a) 200 mA cm<sup>-2</sup> for 12 h, (b) 500 mA cm<sup>-2</sup> for 12 h, (c) 1000 mA cm<sup>-2</sup> for 4 h, and (d) after the anodic polarization at 500 mA cm<sup>-2</sup> for 12 h. The YSZ electrolyte without the cathodic polarization is shown in (e). The LSM electrodes were removed by HCl treatment.

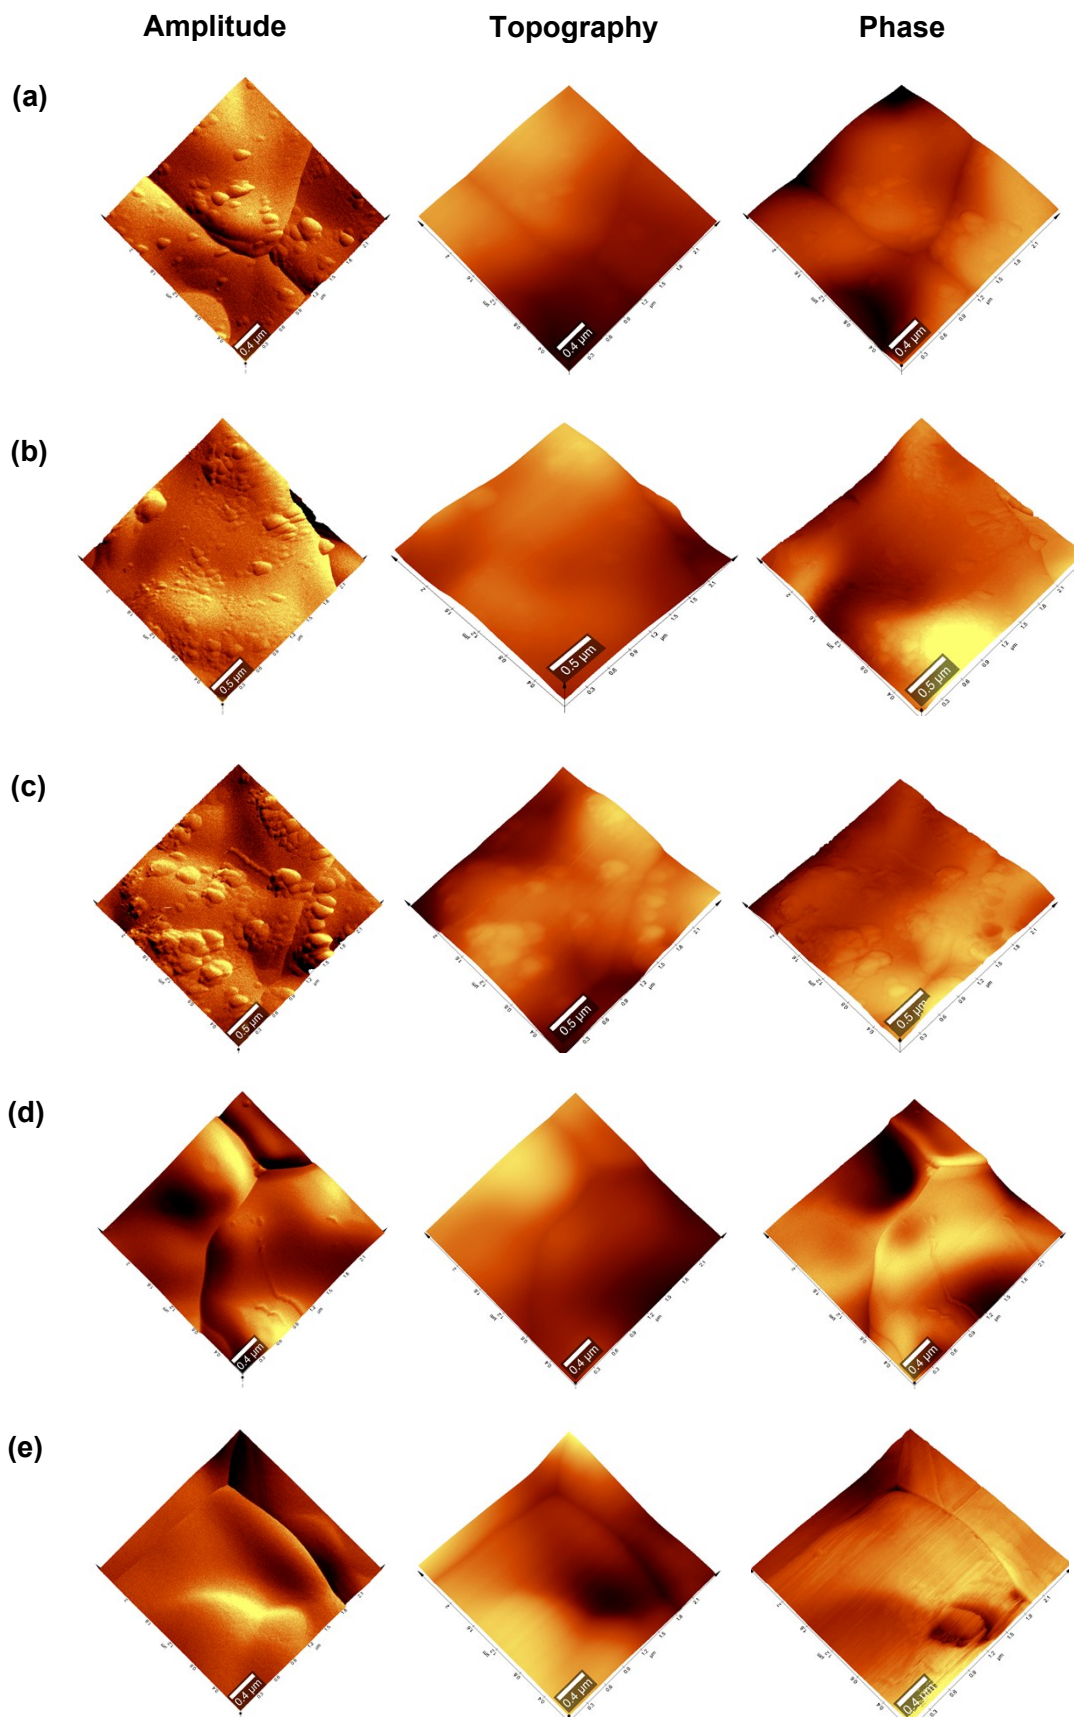

**Figure S3** AFM amplitudes, topographies and phases of electrolyte surface in contact with the *in situ* assembled LSM electrodes after the cathodic polarization at 800°C: (a) 200 mA cm<sup>-2</sup> for 12 h, (b) 500 mA cm<sup>-2</sup> for 12 h, (c) 1000 mA cm<sup>-2</sup> for 4 h, and (d) after the anodic polarization at 500 mA cm<sup>-2</sup> for 12 h. The YSZ electrolyte without the cathodic polarization is shown in (e).

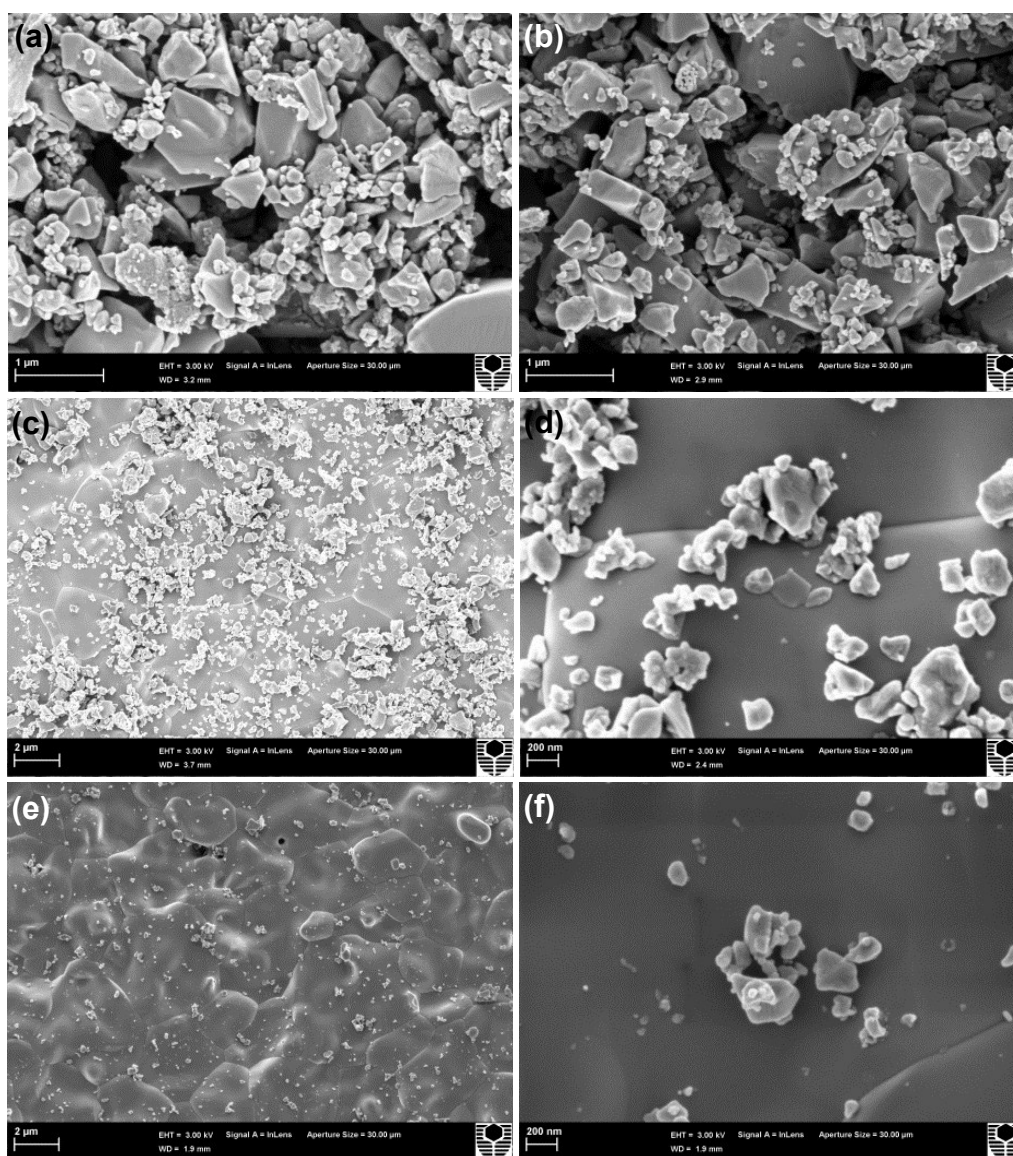

**Figure S4** SEM micrographs of LSM electrode outer surface after the cathodic polarization (a) and anodic polarization (b), and electrolyte surface in contact with the *in situ* assembled LSM electrodes after the cathodic (c,d) and anodic (e,f) polarization at  $500 \text{ mA cm}^{-2}$  and  $800^\circ\text{C}$  for 12 h.
